# Supplementary material for: Pulmonary Arterial Hypertension-Specific Therapy for Atrial Septal Defects with Severe Pulmonary Arterial Hypertension
Source: Research Square preprint supplement (doi:10.21203/rs.3.rs-8754390/v1), 2026-02-09
Supplement: Supplementary file 1 [file f7c781759bf8af70cb79cce2.docx]

**Supplemental Table 1**

**Hemodynamic changes after targeted PAH treatment.**

|  | **All patients (N =15)** | | **Responder group**  **(n=7)** | | **Non-responder group**  **(n=8)** | | **p value** | |
| --- | --- | --- | --- | --- | --- | --- | --- | --- |
|  | Baseline | After treatment | Baseline  † | After treatment †† | Baseline  ††† | After treatment  †††† | † vs ††† | †† vs †††† |
| sPAP, mmHg | 93.7 ± 13.6 | 76.7 ± 20.1 | 85.7 ± 10.4 | 61.2 ± 16.2 | 100.8 ± 12.5 | 90.5 ± 11.4 | 0.03 | <0.01 |
| dPAP, mmHg | 34.9 ± 8.6 | 27.1 ± 8.6 | 29.6 ± 2.2 | 20.6 ± 3.0 | 39.5 ± 9.5 | 32.9 ± 7.8 | 0.02 | <0.01 |
| mPAP, mmHg | 53.5 ± 9.7 | 44.0 ± 11.8 | 47.9 ± 3.9 | 34.3 ± 6.9 | 58.5 ± 10.7 | 52.5 ± 7.7 | 0.03 | <0.01 |
| PVR, WU | 10.7 ± 5.5 | 7.0 ± 5.2 | 7.0 ± 1.3 | 3.2 ± 1.2 | 13.9 ± 5.8 | 10.3 ± 4.9 | 0.01 | <0.01 |
| Qp/Qs | 1.53 ± 0.63 | 1.72 ± 0.63 | 1.72 ± 0.51 | 2.11 ± 0.71 | 1.37 ± 0.72 | 1.38 ± 0.28 | 0.31 | 0.02 |
| Qp, L/min | 5.06 ± 1.52 | 7.27 ± 3.22 | 6.12 ± 1.14 | 9.70 ± 2.72 | 4.12 ± 1.16 | 5.15 ± 1.82 | <0.01 | <0.01 |
| Qs, L/min | 3.55±1.10 | 4.21 ± 1.32 | 3.91±1.37 | 4.79 ± 1.37 | 3.24 ± 0.74 | 3.70 ± 1.11 | 0.26 | 0.11 |

Continuous values are expressed as mean±SD. P-value was calculated by Student’s t-test.

sPAP: systolic pulmonary arterial pressure, dPAP: diastolic pulmonary arterial pressure, mPAP: mean pulmonary arterial pressure, PVR: pulmonary vascular resistance, Qp/Qs: pulmonary to systemic flow ratio, Qp: pulmonary blood flow, Qs: systemic blood flow
